# Supplementary material
Source: publisher figshare collection journal article supplement (https://frontiersin.figshare.com/ndownloader/files/35187109)
Supplement: Supplementary file [file 35187109]

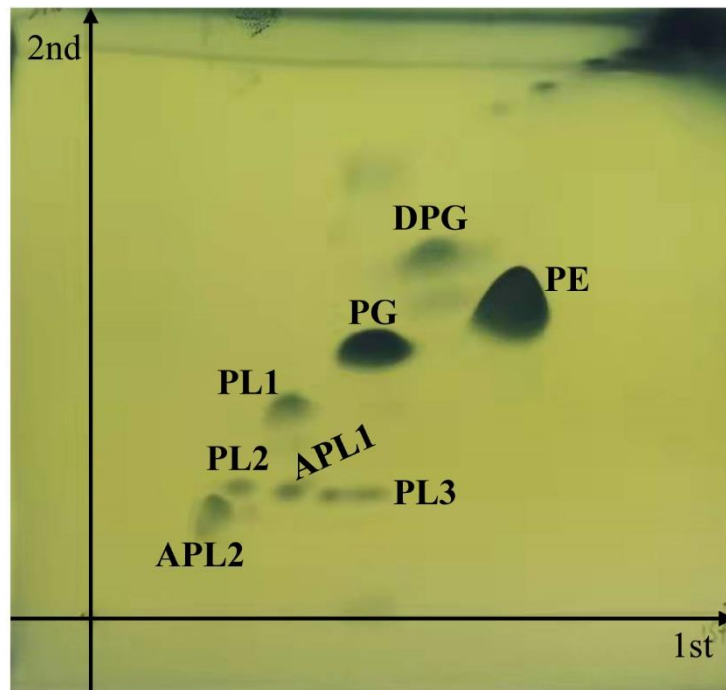

Figure 1 Two-dimensional thin-layer chromatogram of total polar lipids from strain JM10B5a<sup>T</sup>.

PE, phosphatidylethanolamine; PG, phosphatidylglycerol; DPG, diphosphatidylglycerol; PL, unidentified phospholipid; APL, unidentified aminophospholipid.
